# Supplementary material for: Application of Thermosonication in Red Pitaya Juice Processing: Impacts on Native Microbiota and Quality Properties during Storage
Source: MDPI journal article supplement (doi:10.3390/foods10051041), 2021-05-10
Supplement: s1 [file s1]

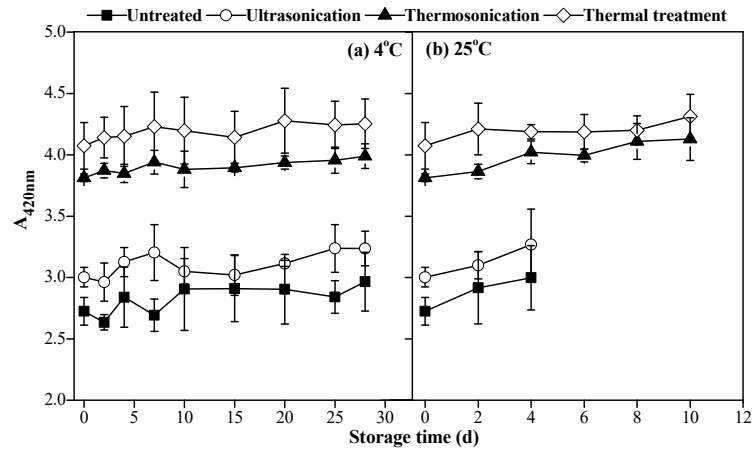

**Figure S1.** The change of browning degree ( $A_{420nm}$ ) of red pitaya juices during storage at 4 °C and 25 °C, as subjected to ultrasonication (475 W, 10 °C, 20 min), thermosonication (475 W, 56 °C, 20 min), and thermal treatment (83 °C, 1.5 min).
